# Supplementary material for: Understanding and Suppressing Gas Evolution in Lithium Metal Batteries with Ether-Based Electrolytes
Source: Research Square preprint supplement (doi:10.21203/rs.3.rs-6034057/v1), 2025-02-27
Supplement: Supplementary file 1 [file 0724c66d17af8b7d5a5a82ce.docx]

Supplementary Information for

**Understanding and Suppressing Gas Evolution in
Lithium Metal Batteries with Ether-Based Electrolytes**

Yuchun Wang1,#, Samantha T. Hung1,#, Ziman Cai1,#, Juanjuan Sun1, Haoran Li1, Jinding Liang1, Lu Bai1, Erxiao Wu1, Ulderico Ulissi1, Xiaolin Yan1 , Xiaonan Luo1,*, Na Liu1, Hansen Wang1,*, Chuying Ouyang1,2,*

*121C LAB, Contemporary Amperex Technology Co., Limited, Ningde 352000, Fujian, China*

*2Department of Physics, Jiangxi Normal University, Nanchang 330022, Jiangxi, China*

#These authors contributed equally to this work.

*Corresponding Authors: WangHS@catl-21c.com, LuoXN@catl-21c.com, OuYangCY@catl.com

**Fig. S1 |** Maximum cell temperatures at different discharging C-rates from simulations* of CATL prismatic Gr||NMC811 cells with 65 Ah capacity and 250 Wh/kg energy density. Temperatures reach over 60 °C during 8 C discharge.

*The simulated temperature measurements with varying discharge C-rates (2-8 C) were conducted using COMSOL Multiphysics 6.1. Prismatic cells produced by CATL (65 Ah, with graphite anode and NMC811 cathode) provided the initial electrode and electrochemical parameters for model development. The heat transfer coefficient obtained under air-cooled conditions was calibrated against temperature measurements of these same prismatic cells at discharge C-rates of 0.2, 0.33, 1, 2, and 3 C.

**Fig. S2 |** Photographs of a Li||NMC cell with 4 M LiFSI/DME after 28 cycles at 60 °C. The cell is swollen from the production of approximately 9 mL gas.

**Fig. S3 | a,** Cycling performance and **b,** charging and discharging curves of d-LFP||LFP cells with 4 M LiFSI/DME at 60 °C. **c,** Photographs of a d-LFP||LFP cell after 30 cycles. The cell remains flat, and no noticeable gas generation was observed.

**Fig. S4 | a,** Calibration curve for T-MS showing the linear regression of the CO2 peak area to the mass of Li2CO3. **b,** T-MS results for the Cu electrodes extracted from Cu||NMC (shown in the main text) and Cu||Li cells that were cycled over 10 cycles with 4 M LiFSI/DME at 60 °C. The very small signal for the Cu||Li cell arises from small amounts of CO2 initially dissolved in the electrolyte. The absence of CO2 signals in **c,** fresh Cu and **d,** delithiated LFP electrodes suggests that the electrodes do not initially contain Li2CO3.

**Fig. S5 | a,** Voltage (black) and cell volume changes (ΔVolume, green) measured *in situ* for d-LFP||NMC cells (cathode half-cells) with 4 M LiFSI/DME at 60 °C. **b,** Zoomed in early time results showing that gas evolution begins during the initial charging at about 0.75 V (4.18 V vs. Li/Li+).

**Fig. S6 |** Cross-sectional SEM micrographs of NMC electrodes under different conditions: **a,** fresh, **b,** extracted from Li||NMC cells with 3 M LiFSI/DME after 12 cycles at 60 °C, and **c,** extracted from Li||NMC cells with 5 M LiFSI/DME after 12 cycles at 60 °C. Cracks were observed in the 3 M LiFSI/DME sample **(b)**, but not in the higher concentration, 5 M LiFSI/DME sample **(c)**.

**Fig. S7 |** Thicknesses of NMC electrodes under different conditions: fresh, extracted from Li||NMC cells with 3 M LiFSI/DME after 12 cycles at 60 °C, and extracted from Li||NMC cells with 5 M LiFSI/DME after 12 cycles at 60 °C.

**Fig. S8 | a,** Cell volume changes (ΔVolume) measured *in situ* for Li||LFP cells with different amounts of added LiCH3. The onset point of gas generation shifts forward in time from cycle 4 with no added LiCH3 to cycle 3 with 3.6 mmol/L of added LiCH3. Gas generation begins almost immediately (cycle 0) with 40 mmol/L of added LiCH3. **b,** Cell volume changes (ΔVolume) measured *in situ* for Li||NMC cells with different amounts of added LiCH3. The onset point of gas generation shifts forward in time from cycle 5 with no added LiCH3 to cycle 3 with 3.6 mmol/L of added LiCH3. Gas generation begins almost immediately (cycle 0) with 40 mmol/L of added LiCH3.

**Fig. S9 |** Cell volume changes (ΔVolume) measured *in situ* for **a,** Li||LFP and **b,** Li||NMC cells, both for 4 M LiFSI/DME cycled at 60 °C. The onset point is after cycle 4 for the Li||LFP cell and after cycle 5 for the Li||NMC cell.

**Fig. S10 |** Simulations show that for the first step of DME reduction at the anode (main text, Fig. 3g), the activation energy is lower for formingLiCH3 at **a,** lower LiFSI concentration (0.69 eV) than at **b,** higher LiFSI concentration (0.88 eV). Similarly, the activation energy is lower for formingLiOCH3 at **c,** lower LiFSI concentration (0.58 eV) than at **d,** higher LiFSI concentration (0.75 eV).

**Fig. S11 | a,** Calibration curve for IC showing the linear regression of the LiFSI peak area to the LiFSI concentration. **b,** Consumption of LiFSI (circles) and DME (squares) in 4 M LiFSI/DME in Li||NMC and Li||LFP cells. The decrease in LiFSI concentration (triangles) is also tracked with number of cycles.

**Fig. S12 | a,** Cycling performance, **b,** cycle number (at 80% SOC) and stripping capacity, and **c,** cell volume changes measured *in situ* for Li||NMC cells that underwent anode activation by first discharging at constant voltage (varying between 1.3 to 2.1 V) to a cut-off current of 13 mA.

These potentiostatic discharge experiments were used to determine a suitable cut-off voltage to use in the actual anode activation procedure, in which step-wise discharging to a cut-off voltage with increasingly smaller currents was performed. When the discharge voltage is set too high, insufficient utilization of the active material occurs. As seen in Fig. S12a, capacity retention was poor when activating with a discharge voltage ≥1.9 V. Concurrently, gas generation with an obvious onset point was also observed for voltages ≥1.9 V (Fig. S12c). On the other hand, a discharge voltage that is too low, such as 1.3 V, can also reduce the cycle life due to negative impacts on the cathode structural stability. Therefore, an intermediate voltage of 1.5 V was selected.

**Fig. S13 |** Radial distribution functions *g*(*r*) (black curves) and cumulative radial distribution functions *n*(*r*) (magenta curves) of specific atom(s) on different electrolyte species (differentiated by line dash type) as a function of distance *r* from a Li atom in **a**, HCE **b,** LHCE and **c,** FEE. The Li coordination numbers for each species, i.e., the average number of molecules in the first Li solvation shell, are shown next to the corresponding curves.

**Table S1 | T-MS results for Li2CO3 deposited at 60 °C**

|  | **(mg)** | **ndeposited Li *a*(mmol)** |
| --- | --- | --- |
| Cu electrode from Cu||NMC | 2.567 | 49.33 |
| LFP electrode from d-LFP||NMC | 0 | 49.21 |
| Cu electrode from Cu||Li | 0.1444 | 49.03 |
| Fresh Cu electrode | 0 | - |
| Delithiated LFP electrode | 0 | - |

*a*Total amount of Li deposited over 10 cycles.

**Table S2 | Composition of gas produced in Li||NMC (full cell)
with 4 M LiFSI/DME at 60 °C**

|  | **CO2 (%)** | **C2H4 (%)** | **C2H2 (%)** | **C2H6 (%)** | **C3H6 (%)** | **C3H8 (%)** | **H2 (%)** | **O2 (%)** | **CH4 (%)** | **CO (%)** |
| --- | --- | --- | --- | --- | --- | --- | --- | --- | --- | --- |
| Sample 1 | - | 0.006 | - | 2.684 | 0.016 | 0.019 | - | 0.106 | 97.168 | - |
| Sample 2 | - | 0.007 | - | 2.992 | 0.018 | 0.021 | - | 0.049 | 96.912 | - |
| **Average** | **-** | **0.007** | **-** | **2.838** | **0.017** | **0.020** | **-** | **0.078** | **97.040** | **-** |
| **St. Dev.** | **-** | **0.001** | **-** | **0.154** | **0.001** | **0.001** | **-** | **0.029** | **0.128** | **-** |

**Table S3 | Composition of gas produced in d-LFP||NMC (cathode half-cell)
with 4 M LiFSI/DME at different temperatures**

|  |  | **CO2 (%)** | **C2H4 (%)** | **C2H2 (%)** | **C2H6 (%)** | **C3H6 (%)** | **C3H8 (%)** | **H2 (%)** | **O2 (%)** | **CH4 (%)** | **CO (%)** |
| --- | --- | --- | --- | --- | --- | --- | --- | --- | --- | --- | --- |
| **45 °C** | Sample 1 | 62.890 | - | - | - | - | - | 0.431 | 2.255 | 0.003 | 34.421 |
| Sample 2 | 63.639 | - | - | - | - | - | 0.473 | 2.279 | 0.001 | 33.608 |
| **Average** | **63.265** | **-** | **-** | **-** | **-** | **-** | **0.452** | **2.267** | **0.002** | **34.015** |
| **St. Dev.** | **0.375** | **-** | **-** | **-** | **-** | **-** | **0.021** | **0.012** | **0.001** | **0.407** |
| **60 °C** | Sample 1 | 54.964 | 0.006 | - | - | - | - | 0.195 | 1.238 | 0.026 | 43.568 |
| Sample 2 | 56.759 | 0.004 | - | - | - | - | 0.233 | 1.199 | 0.014 | 41.789 |
| **Average** | **55.862** | **0.005** | **-** | **-** | **-** | **-** | **0.214** | **1.219** | **0.020** | **42.679** |
| **St. Dev.** | **0.898** | **0.001** | **-** | **-** | **-** | **-** | **0.019** | **0.020** | **0.006** | **0.889** |
| **70 °C** | Sample 1 | 57.389 | 0.004 | 0.004 | - | - | - | 0.214 | 1.319 | 0.013 | 41.054 |
| Sample 2 | 55.683 | 0.003 | 0.004 | - | - | - | 0.232 | 1.540 | 0.007 | 42.528 |
| **Average** | **56.536** | **0.004** | **0.004** | **-** | **-** | **-** | **0.223** | **1.430** | **0.010** | **41.791** |
| **St. Dev.** | **0.853** | **0.001** | **0** | **-** | **-** | **-** | **0.009** | **0.111** | **0.003** | **0.737** |

**Table S4 | Composition of gas produced in d-LFP||NMC (cathode half-cell)
with different molar concentrations of LiFSI/DME at 60 °C**

|  |  | **CO2 (%)** | **C2H4 (%)** | **C2H2 (%)** | **C2H6 (%)** | **C3H6 (%)** | **C3H8 (%)** | **H2 (%)** | **O2 (%)** | **CH4 (%)** | **CO (%)** |
| --- | --- | --- | --- | --- | --- | --- | --- | --- | --- | --- | --- |
| **2 M** | Sample 1 | 64.627 | - | - | - | - | - | 1.049 | 0.279 | 0.050 | 33.995 |
| Sample 2 | 66.291 | - | - | - | - | - | 0.859 | - | 0.046 | 32.803 |
| **Average** | **65.459** | **-** | **-** | **-** | **-** | **-** | **0.954** | **-** | **0.048** | **33.399** |
| **St. Dev.** | **0.832** | **-** | **-** | **-** | **-** | **-** | **0.100** | **-** | **0.002** | **0.596** |
| **4 M** | Sample 1 | 54.964 | 0.006 | - | - | - | - | 0.195 | 1.238 | 0.026 | 43.568 |
| Sample 2 | 56.759 | 0.004 | - | - | - | - | 0.233 | 1.199 | 0.014 | 41.789 |
| **Average** | **55.862** | **0.005** | **-** | **-** | **-** | **-** | **0.214** | **1.219** | **0.020** | **42.679** |
| **St. Dev.** | **0.898** | **0.001** | **-** | **-** | **-** | **-** | **0.019** | **0.020** | **0.006** | **0.889** |
| **5 M** | Sample 1 | 67.764 | 0.004 | - | - | 0.011 | 0.001 | 0.345 | 1.664 | 0.007 | 30.205 |
| Sample 2 | 70.642 | 0.005 | - | - | 0.010 | 0.001 | 0.177 | 1.508 | 0.007 | 27.649 |
| **Average** | **69.203** | **0.005** | **-** | **-** | **0.011** | **0.001** | **0.261** | **1.586** | **0.007** | **28.927** |
| **St. Dev.** | **1.439** | **0.001** | **-** | **-** | **0.001** | **-** | **0.084** | **0.078** | **-** | **1.278** |

**Table S5 | Composition of gas produced in Li||LFP (anode half-cell)
with 4 M LiFSI/DME at different temperatures**

|  |  | **CO2 (%)** | **C2H4 (%)** | **C2H2 (%)** | **C2H6 (%)** | **C3H6 (%)** | **C3H8 (%)** | **H2 (%)** | **O2 (%)** | **CH4 (%)** | **CO (%)** |
| --- | --- | --- | --- | --- | --- | --- | --- | --- | --- | --- | --- |
| **60 °C** | Sample 1 | - | 0.064 | 0.006 | 1.952 | 0.028 | 0.071 | 0.032 | 0.579 | 97.269 | - |
| Sample 2 | - | 0.033 | 0.002 | 1.792 | 0.032 | 0.036 | 0.089 | 0.571 | 97.446 | - |
| **Average** | **-** | **0.049** | **0.004** | **1.872** | **0.03** | **0.054** | **0.061** | **0.575** | **97.358** | **-** |
| **St. Dev.** | **-** | **0.016** | **0.002** | **0.080** | **0.002** | **0.018** | **0.029** | **0.004** | **0.089** | **-** |
| **70 °C** | Sample 1 | - | 0.009 | 0.001 | 2.827 | 0.048 | 0.023 | - | 0.270 | 96.822 | - |
| Sample 2 | - | 0.229 | 2.822 | 1.770 | 0.053 | 0.178 | 0.113 | 0.521 | 94.314 | - |
| **Average** | **-** | **0.119** | **1.412** | **2.299** | **0.051** | **0.101** | **-** | **0.396** | **95.568** | **-** |
| **St. Dev.** | **-** | **0.110** | **1.411** | **0.529** | **0.003** | **0.078** | **-** | **0.126** | **1.254** | **-** |

**Table S6 | Composition of gas produced in Li||LFP (anode half-cell)
with different molar concentrations of LiFSI/DME at 60 °C**

|  |  | **CO2 (%)** | **C2H4 (%)** | **C2H2 (%)** | **C2H6 (%)** | **C3H6 (%)** | **C3H8 (%)** | **H2 (%)** | **O2 (%)** | **CH4 (%)** | **CO (%)** |
| --- | --- | --- | --- | --- | --- | --- | --- | --- | --- | --- | --- |
| **2 M** | Sample 1 | - | 0.153 | 0.000 | 1.756 | 0.074 | 0.016 | 0.015 | 0.253 | 97.734 | - |
| Sample 2 | - | 0.036 | 0.003 | 0.705 | 0.065 | 0.116 | 0.227 | 0.364 | 98.482 | - |
| **Average** | **-** | **0.095** | **0.002** | **1.231** | **0.070** | **0.066** | **0.121** | **0.309** | **98.108** | **-** |
| **St. Dev.** | **-** | **0.059** | **0.002** | **0.526** | **0.005** | **0.050** | **0.106** | **0.056** | **0.374** | **-** |
| **4 M** | Sample 1 | - | 0.064 | 0.006 | 1.952 | 0.028 | 0.071 | 0.032 | 0.579 | 97.269 | - |
| Sample 2 | - | 0.033 | 0.002 | 1.792 | 0.032 | 0.036 | 0.089 | 0.571 | 97.446 | - |
| **Average** | **-** | **0.049** | **0.004** | **1.872** | **0.030** | **0.054** | **0.061** | **0.575** | **97.358** | **-** |
| **St. Dev.** | **-** | **0.016** | **0.002** | **0.080** | **0.002** | **0.018** | **0.029** | **0.004** | **0.089** | **-** |

**Table S7 | Normalized volume of gas produced in Li||NMC (full cell)
with 4 M LiFSI/DME at 60 °C**

|  | **Total Gas**  **Volume (mL)** | **Design**  **Capacity**  **(Ah)** | **Total Cycled**  **Time**  **(h)** | **Normalized Volume (mL/Ah·h)** |
| --- | --- | --- | --- | --- |
| Sample 1 | 11.550 | 0.140 | 227.817 | 0.362 |
| Sample 2 | 9.498 | 0.140 | 220.617 | 0.308 |
| **Average** |  |  |  | **0.335** |
| **St. Dev.** |  |  |  | **0.027** |

**Table S8 | Normalized volume of gas produced in d-LFP||NMC
(cathode half-cell) with 4 M LiFSI/DME at different temperatures**

|  |  | **Total Gas Volume (mL)** | **Design**  **Capacity**  **(Ah)** | **Total Cycled**  **Time**  **(h)** | **Normalized Volume (mL/Ah·h)** |
| --- | --- | --- | --- | --- | --- |
| **45 °C** | Sample 1 | 0.887 | 0.04 | 232.867 | 0.095 |
| Sample 2 | 0.876 | 0.04 | 233.750 | 0.094 |
| **Average** |  |  |  | **0.094** |
| **St. Dev.** |  |  |  | **0.001** |
| **60 °C** | Sample 1 | 1.071 | 0.04 | 281.550 | 0.095 |
| Sample 2 | 0.981 | 0.04 | 226.000 | 0.109 |
| **Average** |  |  |  | **0.102** |
| **St. Dev.** |  |  |  | **0.007** |
| **70 °C** | Sample 1 | 1.210 | 0.04 | 230.633 | 0.131 |
| Sample 2 | 1.320 | 0.04 | 236.767 | 0.139 |
| **Average** |  |  |  | **0.135** |
| **St. Dev.** |  |  |  | **0.004** |

**Table S9 | Normalized volume of gas produced in d-LFP||NMC
(cathode half-cell) with different molar concentrations of LiFSI/DME at 60 °C**

|  |  | **Total Gas Volume**  **(mL)** | **Design**  **Capacity**  **(Ah)** | **Total Cycled**  **Time**  **(h)** | **Normalized Volume (mL/Ah·h)** |
| --- | --- | --- | --- | --- | --- |
| **2 M** | Sample 1 | 1.810 | 0.04 | 195.567 | 0.231 |
| Sample 2 | 1.470 | 0.04 | 174.550 | 0.210 |
| **Average** |  |  |  | **0.221** |
| **St. Dev.** |  |  |  | **0.010** |
| **4 M** | Sample 1 | 1.071 | 0.04 | 281.550 | 0.095 |
| Sample 2 | 0.981 | 0.04 | 226.000 | 0.109 |
| **Average** |  |  |  | **0.102** |
| **St. Dev.** |  |  |  | **0.007** |
| **5 M** | Sample 1 | 0.620 | 0.04 | 188.300 | 0.082 |
| Sample 2 | 0.794 | 0.04 | 199.267 | 0.100 |
| **Average** |  |  |  | **0.091** |
| **St. Dev.** |  |  |  | **0.009** |

**Table S10 | Normalized volume of gas produced in Li||LFP (anode half-cell)
with 4 M LiFSI/DME at different temperatures**

|  |  | **Total Gas Volume (mL)** | **Design**  **Capacity**  **(Ah)** | **Total Cycled**  **Time**  **(h)** | **Normalized Volume (mL/Ah)** |
| --- | --- | --- | --- | --- | --- |
| **60 °C** | Sample 1 | 6.134 | 0.15 | 124.500 | 0.328 |
| Sample 2 | 6.314 | 0.15 | 127.500 | 0.330 |
| **Average** |  |  |  | **0.329** |
| **St. Dev.** |  |  |  | **0.001** |
| **70 °C** | Sample 1 | 4.625 | 0.15 | 25.300 | 1.219 |
| Sample 2 | 4.375 | 0.15 | 24.983 | 1.167 |
| **Average** |  |  |  | **1.193** |
| **St. Dev.** |  |  |  | **0.027** |

**Table S11 | Normalized volume of gas produced in Li||LFP (anode half-cell)
with different molar concentrations of LiFSI/DME at 60 °C**

|  |  | **Total Gas Volume (mL)** | **Design**  **Capacity**  **(Ah)** | **Total Cycled**  **Time**  **(h)** | **Normalized Volume (mL/Ah)** |
| --- | --- | --- | --- | --- | --- |
| **2 M** | Sample 1 | 2.720 | 0.15 | 33.783 | 0.536 |
| Sample 2 | 3.280 | 0.15 | 33.633 | 0.650 |
| **Average** |  |  |  | **0.593** |
| **St. Dev.** |  |  |  | **0.057** |
| **4 M** | Sample 1 | 6.134 | 0.15 | 124.500 | 0.328 |
| Sample 2 | 6.314 | 0.15 | 127.500 | 0.330 |
| **Average** |  |  |  | **0.329** |
| **St. Dev.** |  |  |  | **0.001** |

**Table S12 | Composition of gas produced in Li-NMC (full cell)
with the addition of LiCH3**

| **LiCH3 Concentration**  **(mmol/L)** | **CO2 (%)** | **C2H4 (%)** | **C2H2 (%)** | **C2H6 (%)** | **C3H6 (%)** | **C3H8 (%)** | **H2 (%)** | **O2 (%)** | **CH4 (%)** | **CO (%)** |
| --- | --- | --- | --- | --- | --- | --- | --- | --- | --- | --- |
| 3.6 | - | - | - | 2.931 | 0.070 | - | - | - | 96.998 | - |
| 40 | 3.787 | 0.006 | - | 3.725 | 0.054 | - | 3.209 | - | 89.221 | - |

**Table S13 | Gibbs free energy and activation energy involved
in the generation of CH4 at the anode**

| **Step*a*** | **Reaction** | **ΔG‡ (eV)** | **ΔG (eV)** |
| --- | --- | --- | --- |
| 1 | 2Li + DME → **LiCH3**+ LiOCH2CH2OCH3 | 0.69 | −3.58 |
| 2Li + DME → **LiOCH3** + **LiC2H4OCH3** | 0.58 | −2.69 |
| 2A | **LiCH3**+ DME → Li-CH2OCH2CH2OCH3+ **CH4** | 1.14 | −0.28 |
| 2B | **LiCH3**+ **LiC2H4OCH3** → 2Li + CH2=CHOCH3 + **CH4** | 0.88 | −0.75 |

*a*Refer to main text Figs. 3g-i.
